# Supplementary material for: Disulfidptosis-related lncRNAs signature predicting prognosis and immunotherapy effect in lung adenocarcinoma
Source: publisher site journal article supplement (doi:10.18632/aging.205911), 2024-06-10
Supplement: Supplementary file [file aging-v16i11-205911-supplementary-material-SD1.pdf]

## SUPPLEMENTARY TABLES

**Supplementary Table 1. The sequence of primers of DRG-lncRNAs.**

| Gene       |         | Primer (5'–3')          |
|------------|---------|-------------------------|
| AL365181.2 | Forward | ATGGTTAGAGAATGGGAGAGGAG |
|            | Reverse | AGAGTTGGCTTCGGAGGAAAT   |
| AC090559.1 | Forward | TCAGCGACGGAAAGAGTATGA   |
|            | Reverse | CCACTGGTTTCTGACTGGATGT  |
| AC090559.1 | Forward | CAAGTACATTGCTCCTCCTGAG  |
|            | Reverse | ACATCTGCTGGAAGGTGGACA   |
| GSEC       | Forward | TCGAAATGGACCCCAACTA     |
|            | Reverse | TGCACTTCTCCGACGTCC      |
| AC090559.1 | Forward | TGTGCCATACCATTAAACAGG   |
|            | Reverse | GCCTCT GATTGAAAATGAGAAC |
| GAPDH      | Forward | GAACGGGAAGCTCACTGG      |
|            | Reverse | GCCTGCTTACCACCTTCT      |

**Supplementary Table 2. The expression of DRG-lncRNAs in LUAD.**

| Disulfidptosis | lncRNA      | cor        | p-value  | Regulation |
|----------------|-------------|------------|----------|------------|
| LRPPRC         | LYRM4-AS1   | 0.4616865  | 6.47E-30 | positive   |
| SLC7A11        | AL365181.3  | 0.48665534 | 1.63E-33 | positive   |
| NDUFA11        | AC010331.1  | 0.40766643 | 4.46E-23 | positive   |
| NDUFA11        | AC011498.6  | 0.42719621 | 2.08E-25 | positive   |
| NDUFA11        | AC092171.4  | 0.4201018  | 1.52E-24 | positive   |
| LRPPRC         | EMSLR       | 0.40842408 | 3.64E-23 | positive   |
| NDUFA11        | SNHG10      | 0.41122497 | 1.72E-23 | positive   |
| SLC7A11        | LINC01269   | 0.43523783 | 2.05E-26 | positive   |
| NDUFA11        | AC027601.1  | 0.48489064 | 2.99E-33 | positive   |
| NDUFA11        | AL390719.2  | 0.4646525  | 2.50E-30 | positive   |
| TLN1           | AP001189.3  | 0.48633963 | 1.82E-33 | positive   |
| NDUFA11        | AC008764.6  | 0.49134708 | 3.18E-34 | positive   |
| LRPPRC         | AC091057.1  | 0.43879128 | 7.24E-27 | positive   |
| NDUFA11        | AP006621.4  | 0.40495252 | 9.14E-23 | positive   |
| NDUFA11        | AC008608.2  | 0.45525499 | 4.91E-29 | positive   |
| NDUFS1         | MIR4713HG   | 0.40761158 | 4.52E-23 | positive   |
| RPN1           | STK4-AS1    | 0.42887143 | 1.29E-25 | positive   |
| NCKAP1         | STARD7-AS1  | 0.40501191 | 9.00E-23 | positive   |
| NDUFA11        | AC087741.1  | 0.4119552  | 1.41E-23 | positive   |
| NDUFS1         | AC015922.2  | 0.41801481 | 2.71E-24 | positive   |
| NCKAP1         | AC015922.2  | 0.40355983 | 1.32E-22 | positive   |
| NDUFA11        | ARRDC1-AS1  | 0.46392801 | 3.16E-30 | positive   |
| NDUFA11        | AC116407.2  | 0.4070504  | 5.25E-23 | positive   |
| NDUFA11        | PP7080      | 0.42846866 | 1.45E-25 | positive   |
| NDUFA11        | AL033527.2  | 0.43450003 | 2.55E-26 | positive   |
| NDUFA11        | AC084125.2  | 0.42219904 | 8.49E-25 | positive   |
| NDUFA11        | AC015912.3  | 0.44201762 | 2.78E-27 | positive   |
| NCKAP1         | AL606834.1  | 0.41467274 | 6.76E-24 | positive   |
| LRPPRC         | RNASEH1-AS1 | 0.43314533 | 3.77E-26 | positive   |
| NDUFA11        | C9orf163    | 0.4539165  | 7.44E-29 | positive   |
| NDUFA11        | AC020558.2  | 0.40452698 | 1.02E-22 | positive   |
| PRDX1          | AL139039.3  | 0.43287069 | 4.09E-26 | positive   |

|         |            |            |          |          |
|---------|------------|------------|----------|----------|
| NCKAP1  | AC112220.2 | 0.42661453 | 2.45E-25 | positive |
| FLNB    | AC112220.2 | 0.4288204  | 1.31E-25 | positive |
| LRPPRC  | KTN1-AS1   | 0.47778777 | 3.34E-32 | positive |
| NDUFA11 | AC114730.3 | 0.41930062 | 1.90E-24 | positive |
| PRDX1   | AC145207.8 | 0.41401517 | 8.09E-24 | positive |
| NDUFA11 | AC016773.1 | 0.450647   | 2.04E-28 | positive |
| FLNB    | MANCR      | 0.40514394 | 8.69E-23 | positive |
| NDUFS1  | OIP5-AS1   | 0.45065684 | 2.04E-28 | positive |
| NCKAP1  | OIP5-AS1   | 0.45918296 | 1.43E-29 | positive |
| NDUFA11 | AC087289.2 | 0.48790871 | 1.06E-33 | positive |
| NDUFA11 | AC011462.4 | 0.41035127 | 2.18E-23 | positive |
| NDUFA11 | CACTIN-AS1 | 0.43957162 | 5.75E-27 | positive |
| NDUFA11 | AC133552.5 | 0.40334438 | 1.39E-22 | positive |
| NCKAP1  | FGD5-AS1   | 0.4255597  | 3.30E-25 | positive |
| NDUFA11 | AC009065.4 | 0.50823316 | 7.14E-37 | positive |
| NDUFA11 | AC132872.2 | 0.46745917 | 1.01E-30 | positive |
| SLC7A11 | AL365181.2 | 0.41424494 | 7.60E-24 | positive |
| NCKAP1  | AL606489.1 | 0.42363616 | 5.68E-25 | positive |
| OXSM    | GAS5       | 0.46299476 | 4.26E-30 | positive |
| NDUFA11 | MHENCN     | 0.47477316 | 9.16E-32 | positive |
| NDUFA11 | AP001412.1 | 0.45967052 | 1.23E-29 | positive |
| NUBPL   | AC011815.1 | 0.48655792 | 1.69E-33 | positive |
| NDUFA11 | KMT2E-AS1  | 0.55066054 | 3.21E-44 | positive |
| NDUFA11 | AL928654.2 | 0.41029518 | 2.21E-23 | positive |
| NUBPL   | AL132800.1 | 0.47590879 | 6.27E-32 | positive |
| ACTB    | AC093673.1 | 0.51863033 | 1.41E-38 | positive |
| NDUFA11 | SNHG12     | 0.49235071 | 2.23E-34 | positive |
| TLN1    | PTPRN2-AS1 | 0.41229731 | 1.29E-23 | positive |
| NDUFA11 | PTOV1-AS2  | 0.50913148 | 5.12E-37 | positive |
| NDUFA11 | AL513320.1 | 0.475216   | 7.90E-32 | positive |
| NUBPL   | AC004943.2 | 0.41759744 | 3.04E-24 | positive |
| SLC7A11 | LINP1      | 0.44014239 | 4.86E-27 | positive |
| NDUFA11 | SNHG11     | 0.40738953 | 4.80E-23 | positive |
| LRPPRC  | AC234917.3 | 0.45836847 | 1.85E-29 | positive |
| OXSM    | ENTPD3-AS1 | 0.46439818 | 2.72E-30 | positive |
| RPN1    | AC137695.3 | 0.49766526 | 3.38E-35 | positive |
| TLN1    | AC006033.2 | 0.40671214 | 5.74E-23 | positive |
| SLC3A2  | AP003119.2 | 0.41510433 | 6.01E-24 | positive |
| PRDX1   | AC026785.3 | 0.46229842 | 5.32E-30 | positive |
| TLN1    | AL450326.1 | 0.44880561 | 3.59E-28 | positive |
| NDUFA11 | AC074212.1 | 0.43588729 | 1.70E-26 | positive |
| NDUFA11 | MIR762HG   | 0.41873006 | 2.22E-24 | positive |
| NDUFA11 | LMNTD2-AS1 | 0.41173916 | 1.50E-23 | positive |
| NDUFA11 | NALT1      | 0.42555416 | 3.31E-25 | positive |
| NCKAP1  | NORAD      | 0.5041224  | 3.25E-36 | positive |
| NDUFA11 | CAHM       | 0.44866595 | 3.74E-28 | positive |
| LRPPRC  | AC003086.1 | 0.42178669 | 9.52E-25 | positive |
| PRDX1   | AC092115.3 | 0.42534814 | 3.51E-25 | positive |
| PRDX1   | AC106045.1 | 0.41648121 | 4.13E-24 | positive |
| PRDX1   | GSEC       | 0.44076205 | 4.04E-27 | positive |
| NDUFA11 | LINC01023  | 0.42020526 | 1.48E-24 | positive |
| NDUFA11 | AC005387.1 | 0.53310944 | 4.71E-41 | positive |
| RPN1    | AC104472.4 | 0.41285638 | 1.11E-23 | positive |
| NCKAP1  | AC021037.1 | 0.44649135 | 7.25E-28 | positive |
| NDUFA11 | AL355353.1 | 0.40890105 | 3.21E-23 | positive |
| ACTB    | C10orf55   | 0.43251269 | 4.53E-26 | positive |

|         |             |            |          |          |
|---------|-------------|------------|----------|----------|
| NDUFA11 | AP003419.3  | 0.40444853 | 1.04E-22 | positive |
| NDUFA11 | LINC01089   | 0.48277    | 6.19E-33 | positive |
| FLNA    | AL645939.5  | 0.4022659  | 1.85E-22 | positive |
| LRPPRC  | AC012073.1  | 0.51295597 | 1.22E-37 | positive |
| LRPPRC  | SNHG16      | 0.53660407 | 1.14E-41 | positive |
| NDUFA11 | AC008760.1  | 0.4164544  | 4.16E-24 | positive |
| NDUFA11 | LINC01311   | 0.4642363  | 2.86E-30 | positive |
| RPN1    | LINC01063   | 0.44878181 | 3.61E-28 | positive |
| TLN1    | AL513165.1  | 0.40699338 | 5.33E-23 | positive |
| LRPPRC  | ALMS1-IT1   | 0.41196351 | 1.41E-23 | positive |
| NUBPL   | AL139353.2  | 0.45900853 | 1.51E-29 | positive |
| NDUFS1  | AL590666.2  | 0.40146436 | 2.28E-22 | positive |
| SLC7A11 | AL590666.2  | 0.44747427 | 5.38E-28 | positive |
| GYS1    | LINC01960   | 0.40149113 | 2.26E-22 | positive |
| NCKAP1  | USP46-DT    | 0.44039088 | 4.51E-27 | positive |
| SLC3A2  | AC092718.4  | 0.42561952 | 3.25E-25 | positive |
| TLN1    | AC090559.1  | 0.46384241 | 3.25E-30 | positive |
| NDUFA11 | AC012615.1  | 0.52549242 | 9.77E-40 | positive |
| NDUFA11 | TMEM147-AS1 | 0.40948932 | 2.74E-23 | positive |
| NDUFA11 | AL136295.2  | 0.43484344 | 2.30E-26 | positive |

---
